# Supplementary material for: Optimization of chondroitin production in E. coli using genome scale models
Source: Royal Society of Chemistry journal article supplement (doi:10.1039/d3me00199g), 2024-01-01
Supplement: d3me00199g1.pdf [file d3me00199g1.pdf]

## Optimization of chondroitin production in *E. coli* using genome scale models

Márcia R. Couto<sup>a</sup>, Joana L. Rodrigues<sup>\*a,b</sup>, Adelaide Braga<sup>a,b</sup>, Oscar Dias<sup>a,b</sup>, Lúgia Rodrigues<sup>a,b</sup>

<sup>a</sup> Centre of Biological Engineering, University of Minho, Braga, Portugal

<sup>b</sup> LABBELS – Associate Laboratory, Braga, Guimarães, Portugal .

\* Corresponding author, e-mail address: [joanarodrigues@deb.uminho.pt](mailto:joanarodrigues@deb.uminho.pt)

### Supplementary Information

**Table SI1.** Optimization of chondroitin production using OptFlux. The optimization algorithm was run at least four times for each model. The predicted phenotype for the unmodified and modified strains (from the resulting solutions with highest biomass-product coupled yield (BPCY)) are shown. BPCY is calculated by OptFlux by multiplying biomass by product and then dividing by substrate consumed (in all cases being 10 mmol/g<sub>DW</sub>/h), as predicted by pFBA simulation. Flux variability analysis (FVA) results are shown as minimum and maximum chondroitin obtained through pFBA for fixed biomass. Predicted biomass and chondroitin values are in units of h<sup>-1</sup> and mmol/g<sub>DW</sub>/h, respectively.

| Model             | BPCY    | Genes modified      |                | Predicted phenotype (pFBA) |             | FVA             |                 |
|-------------------|---------|---------------------|----------------|----------------------------|-------------|-----------------|-----------------|
|                   |         | Underexpression     | Overexpression | Biomass                    | Chondroitin | Min chondroitin | Max chondroitin |
| iB21_1397_c       | -       | -                   | -              | 0.9756                     | 0.0000      | -               | -               |
| iB21_1397_c       | 0.09607 | <i>cmk</i>          | <i>glmU</i>    | 0.3671                     | 2.6168      | 2.6146          | 2.6345          |
|                   | 0.09607 | <i>pyrH</i>         | <i>glmM</i>    | 0.3671                     | 2.6168      | 2.6146          | 2.6345          |
|                   | 0.09607 | <i>pyrH</i>         | <i>glmU</i>    | 0.3671                     | 2.6168      | 2.6146          | 2.6345          |
|                   | 0.09200 | <i>mltC</i>         | <i>glmU</i>    | 0.6516                     | 1.4119      | 1.4025          | 1.4401          |
|                   | 0.09200 | <i>mltF</i>         | <i>glmU</i>    | 0.6516                     | 1.4119      | 1.4025          | 1.4401          |
|                   | 0.09200 | <i>mltA</i>         | <i>glmU</i>    | 0.6516                     | 1.4119      | 1.4025          | 1.4401          |
|                   | 0.09200 | <i>mltB</i>         | <i>glmU</i>    | 0.6516                     | 1.4119      | 1.4025          | 1.4401          |
|                   | 0.09200 | <i>mltE</i>         | <i>glmU</i>    | 0.6516                     | 1.4119      | 1.4025          | 1.4401          |
|                   | 0.09200 | <i>slt</i>          | <i>glmU</i>    | 0.6516                     | 1.4119      | 1.4025          | 1.4401          |
| iECBD_1354_c      | -       | -                   | -              | 0.9756                     | 0.0000      | -               | -               |
| iECBD_1354_c      | 0.09200 | <i>mltE</i>         | <i>glmM</i>    | 0.6516                     | 1.4119      | 1.4025          | 1.4401          |
|                   | 0.09200 | <i>slt</i>          | <i>glmM</i>    | 0.6516                     | 1.4119      | 1.4025          | 1.4401          |
|                   | 0.09200 | <i>mltC</i>         | <i>glmM</i>    | 0.6516                     | 1.4119      | 1.4025          | 1.4401          |
|                   | 0.09200 | <i>mltA</i>         | <i>glmM</i>    | 0.6516                     | 1.4119      | 1.4025          | 1.4401          |
|                   | 0.09200 | <i>amiABC, ampG</i> | <i>glmU</i>    | 0.6516                     | 1.4119      | 1.4025          | 1.4401          |
|                   | 0.09200 | <i>slt</i>          | <i>glmU</i>    | 0.6516                     | 1.4119      | 1.4025          | 1.4401          |
|                   | 0.09200 | <i>mltB</i>         | <i>glmM</i>    | 0.6516                     | 1.4119      | 1.4025          | 1.4401          |
|                   | 0.09200 | <i>mltF</i>         | <i>glmM</i>    | 0.6516                     | 1.4119      | 1.4025          | 1.4401          |
| iEC1356_BI21DE3_c | -       | -                   | -              | 0.9767                     | 0.000       | -               | -               |
| iEC1356_BI21DE3_c | 0.09215 | <i>mltE</i>         | <i>glmU</i>    | 0.6519                     | 1.4135      | 1.4015          | 1.4417          |
|                   | 0.09215 | <i>oppC</i>         | <i>glmU</i>    | 0.6519                     | 1.4135      | 1.3268          | 1.4417          |
|                   | 0.09215 | <i>mltC</i>         | <i>glmU</i>    | 0.6519                     | 1.4135      | 1.4015          | 1.4417          |
|                   | 0.09215 | <i>oppB</i>         | <i>glmU</i>    | 0.6519                     | 1.4135      | 1.3268          | 1.4417          |
|                   | 0.09215 | <i>oppF</i>         | <i>glmU</i>    | 0.6519                     | 1.4135      | 1.3268          | 1.4417          |
|                   | 0.09215 | <i>amiA</i>         | <i>glmU</i>    | 0.6519                     | 1.4135      | 1.4015          | 1.4417          |
|                   | 0.09215 | <i>amiB</i>         | <i>glmU</i>    | 0.6519                     | 1.4135      | 1.4015          | 1.4417          |
|                   | 0.09215 | <i>oppD</i>         | <i>glmU</i>    | 0.6519                     | 1.4135      | 1.3268          | 1.4417          |
|                   | 0.09215 | <i>mltA</i>         | <i>glmU</i>    | 0.6519                     | 1.4135      | 1.4015          | 1.4417          |
|                   | 0.09215 | <i>mltB</i>         | <i>glmU</i>    | 0.6519                     | 1.4135      | 1.4015          | 1.4417          |
|                   | 0.09215 | <i>amiC</i>         | <i>glmU</i>    | 0.6519                     | 1.4135      | 1.4015          | 1.4417          |
|                   | 0.09215 |                     |                |                            |             |                 |                 |
| iJO1366_c         | -       | -                   | -              | 0.9824                     | 0.000       | -               | -               |
| iJO1366_c         | 0.09287 | <i>mltB</i>         | <i>glmM</i>    | 0.6531                     | 1.4219      | 1.4000          | 1.4501          |
|                   | 0.09287 | <i>mltE</i>         | <i>glmM</i>    | 0.6531                     | 1.4219      | 1.4000          | 1.4501          |

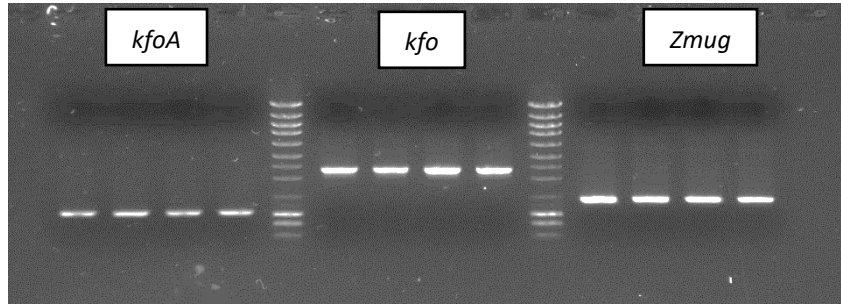

**Figure SI1.** Agarose gel 0.7% showing polymerase chain reaction (PCR) amplification results of genes for chondroitin biosynthetic pathway construction. Ladder: NZYDNA Ladder III, NZYTech.

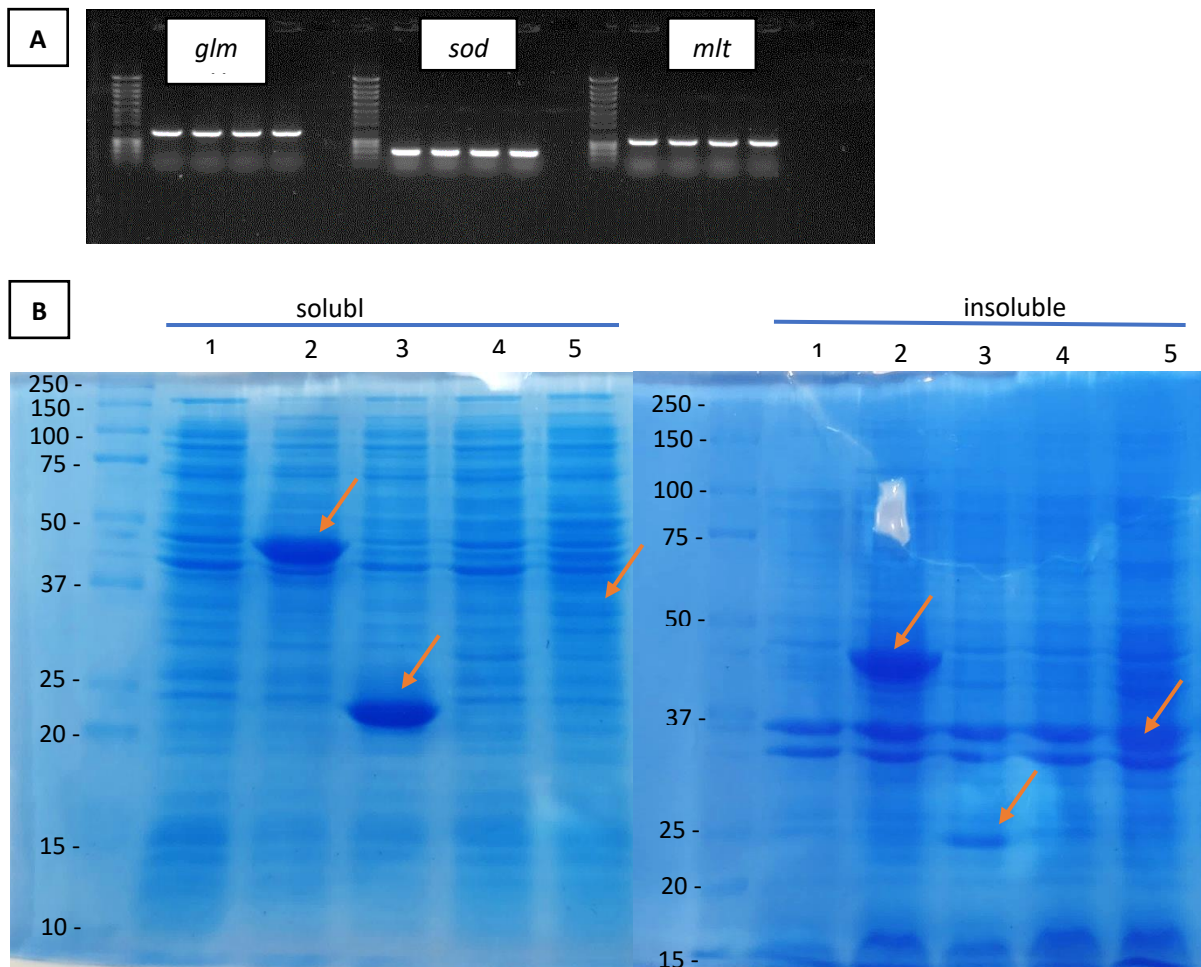

**Figure SI2.** Cloning and expression of identified targets for chondroitin production enhancement: *glmU*, glucosamine-1-phosphate acetyltransferase/*N*-acetylglucosamine-1-phosphate uridylyltransferase; *mltB*, membrane-bound lytic murein transglycosylase; *sodA*, superoxide dismutase. **A.** Agarose gel 0.7% showing PCR result of amplification of genes *glmU*, *sodA* and *mltB* from *E. coli* K-12 MG1655 (DE3) genome. **B.** SDS-PAGE gel showing overexpression of genes *glmU*, *sodA* and *mltB* in *E. coli* K-12 MG1655 (DE3). 1 – pETDuet-1, 2 - pETDuet\_ *glmU*, 3 – pETDuet\_ *sodA*, 4 – pCDFDuet-1, 5 – pCDFDuet\_ *mltB*. The predicted sizes were: GlmU 49.2 kDa; SodaA 24.91 kDa; MltB 41.2 kDa (Slit35 36 kDa).

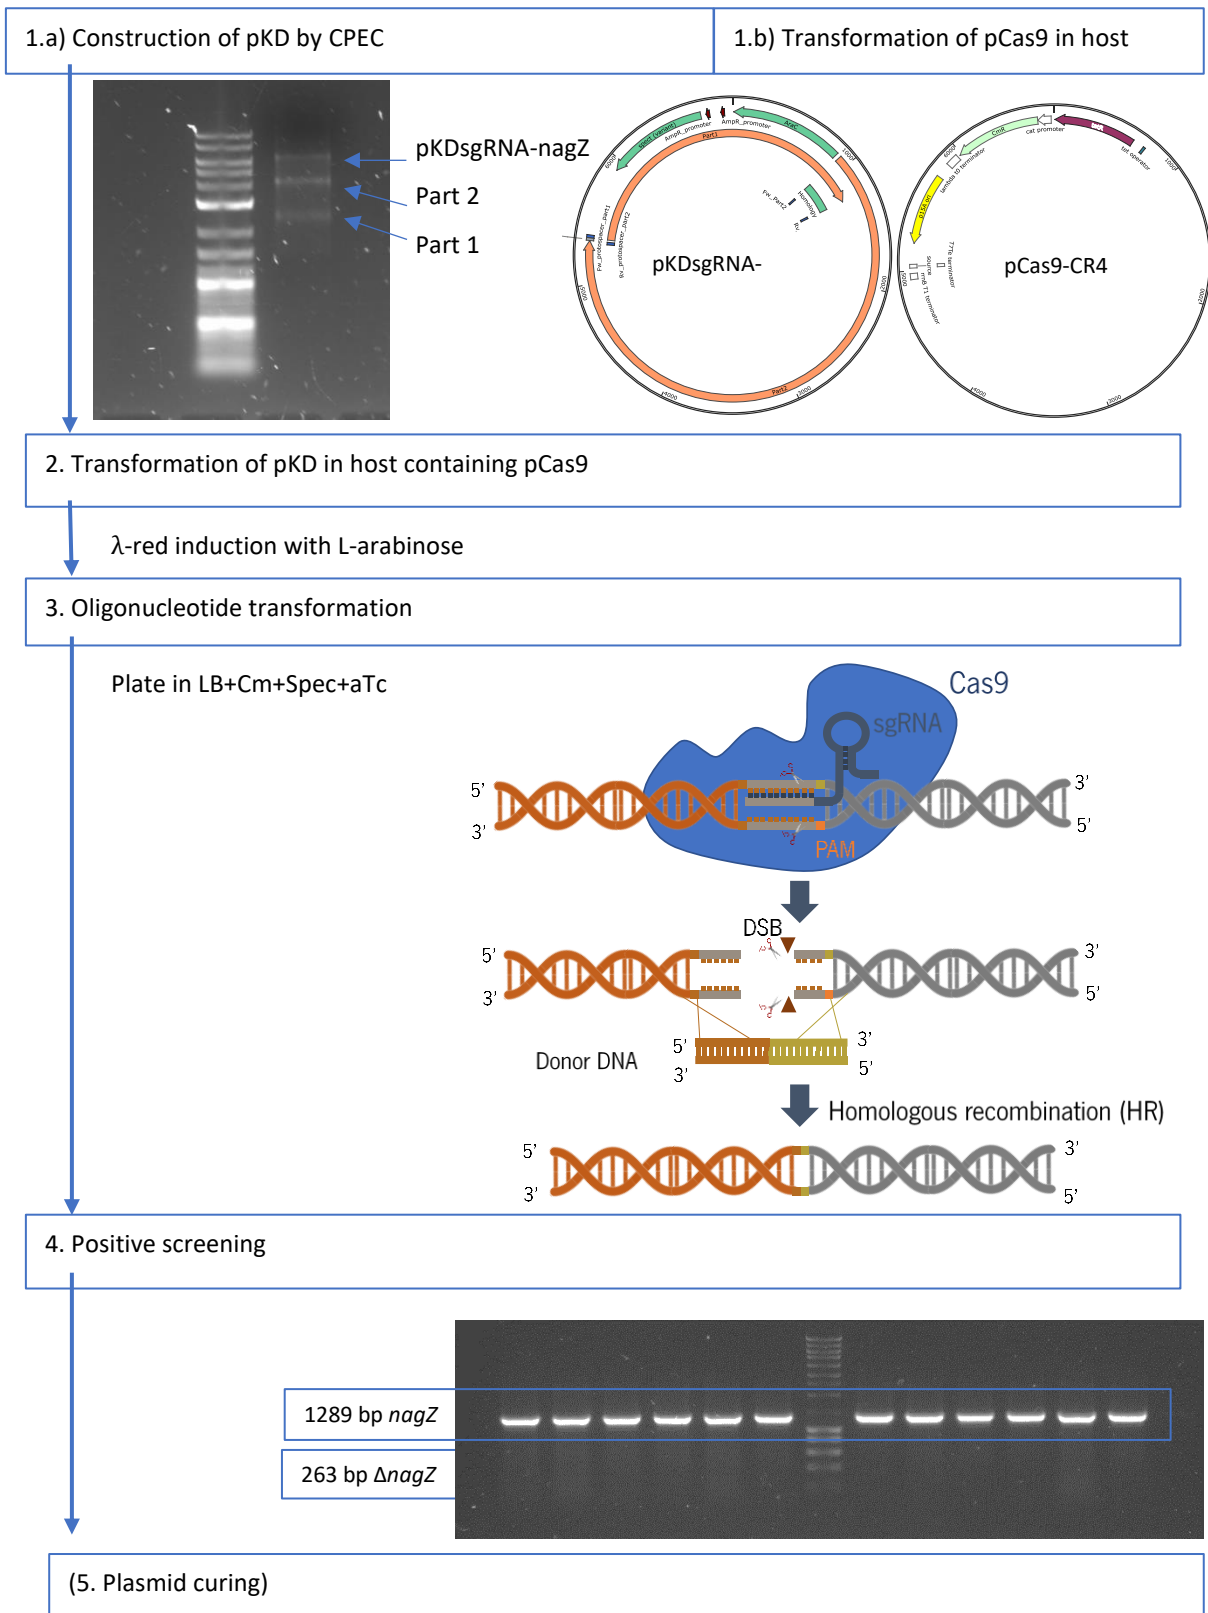

**Figure S13.** Attempted CRISPR-Cas9 strategy for *nagZ* deletion. This methodology consists in the cleavage of double stranded DNA by Cas9 and  $\lambda$ -Red recombinase system-facilitated genomic integration of donor DNA. The single-guide RNA (sgRNA) encoding plasmid pKDsgRNA-*nagZ* to target the *nagZ* has been constructed. The plasmids for the expression of Cas9 and of the sgRNA were transformed. Then, the transformation of the oligonucleotide (donor DNA) that should induce the gene deletion was performed. During the subsequent screenings, no positive colonies were found despite several attempts of this procedure.

## Protospacer construction – Golden Gate Strategy

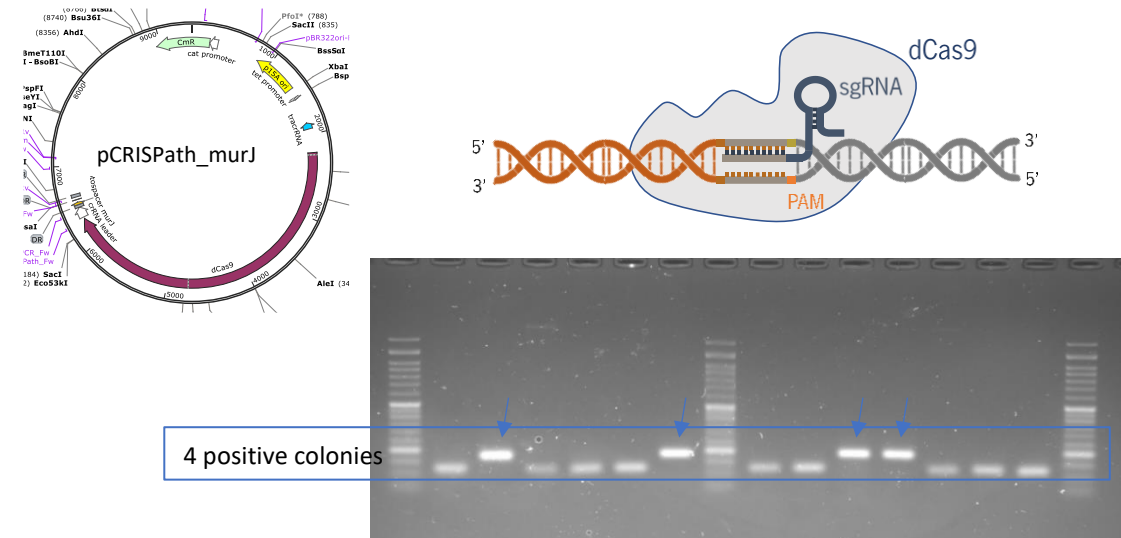

## Sequencing

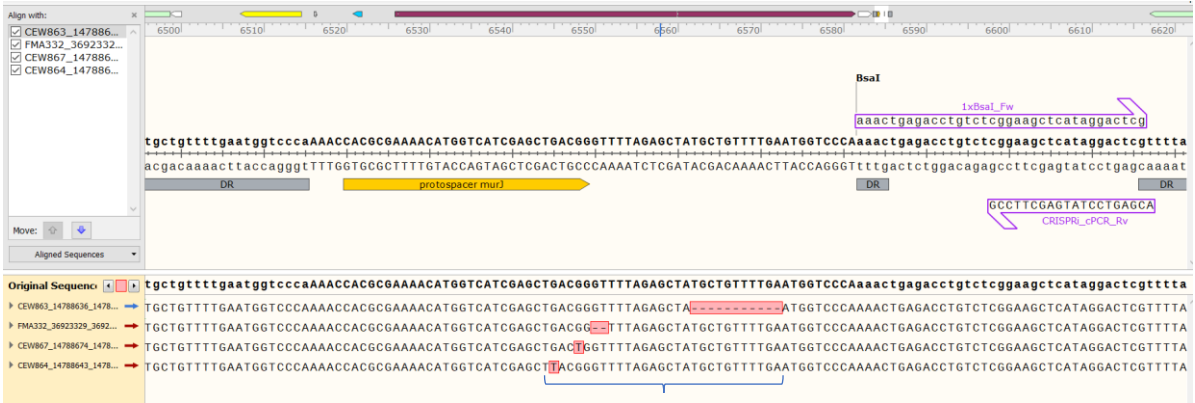

Errors in or next to the protospacer

**Figure S14.** Attempted CRISPR interference (CRISPRi) strategy to underexpress *murJ*. In this strategy, a modified version of the caspase 9 protein, commonly referred as dead Cas9 (dCas9), is expressed to target the *murJ* gene, ultimately repressing its expression. The dCas9 variant lacks nuclease activity but maintains the capability to specifically bind to double stranded DNA sequences. The cloning of the protospacer in the pCRISPathBrick was performed by Golden Gate strategy. The resulting pCRISPath\_murJ revealed that the constructed plasmids constantly exhibited errors in or next to the protospacer.
